# Supplementary material for: Highly efficient dehydrogenation of hydrazine over graphene supported flower-like Ni–Pt nanoclusters at room temperature
Source: Royal Society of Chemistry journal article supplement (doi:10.1039/c4ta02964j), 2014-07-15
Supplement: c4ta02964j1.pdf [file c4ta02964j1.pdf]

## **Highly efficient dehydrogenation of hydrazine over graphene supported flower-like Ni-Pt nanoclusters at room temperature**

Nan Cao<sup>a</sup>, Lan Yang<sup>a</sup>, Cheng Du<sup>a</sup>, Jun Su<sup>c</sup>, Wei Luo<sup>a,b\*</sup>, Gongzhen Cheng<sup>a</sup>

<sup>a</sup>College of Chemistry and Molecular Sciences, Wuhan University, Wuhan, Hubei 430072, P. R. China.

Tel.: +86 2768752366. *E-mail address*: wluo@whu.edu.cn

<sup>b</sup>Suzhou Institute of Wuhan University, Suzhou, Jiangsu, 215123, P. R. China

<sup>c</sup>Wuhan National Laboratory for Optoelectronics, Huazhong University of Science and Technology, Wuhan, Hubei, 430074, P. R. China

### **Experimental**

#### **Chemicals and materials**

All chemicals were commercial and used without further purification. nickel chloride hexahydrate ( $\text{NiCl}_2 \cdot 6\text{H}_2\text{O}$ , Sinopharm Chemical Reagent Co., Ltd.,  $\geq 99\%$ ), potassium chloroplatinate ( $\text{K}_2\text{PtCl}_6$ , Wuhan Greatwall Chemical Co., Ltd., 99%), hydrazine monohydrate ( $\text{H}_4\text{N}_2 \cdot \text{H}_2\text{O}$ , TCI Shanghai Co., Ltd.,  $>98\%$ ), sodium borohydride ( $\text{NaBH}_4$ , Sinopharm Chemical Reagent Co., Ltd., 96%), potassium permanganate ( $\text{KMnO}_4$ , Shanghai Chemic Co., Ltd,  $\geq 99.5\%$ ), hydrogen peroxide ( $\text{H}_2\text{O}_2$ , Sinopharm Chemical Reagent Co., Ltd,  $\geq 30\%$ ), phosphoric acid ( $\text{H}_3\text{PO}_4$ , Sinopharm Chemical Reagent Co., Ltd, AR), sulfuric acid ( $\text{H}_2\text{SO}_4$ , Sinopharm Chemical Reagent Co., Ltd, 95~98%), graphite power (Sinopharm Chemical Reagent Co., Ltd,  $\geq 99.85\%$ ) were used as received. We use ordinary distilled water as the reaction solvent.

#### **Graphene Oxide (GO) preparation**

GO was made by a modified Hummers method [S1-S2]. In an improved synthesis of graphene oxide, a 9:1 mixture of concentrated  $\text{H}_2\text{SO}_4/\text{H}_3\text{PO}_4$  (360:40 mL) was added to a mixture of graphite flakes (3.0 g) and  $\text{KMnO}_4$  (18.0 g). The reaction was then heated to 50 °C and stirred for 12 h. The reaction was cooled to room temperature and poured onto ice (~400 mL) with 30%  $\text{H}_2\text{O}_2$  (3 mL). The addition of 2 mL of excess  $\text{H}_2\text{O}_2$  was followed until observation of a permanent yellow color, which indicating the complete oxidation of graphite. The resultant solution was centrifuged to obtain the product. The product was washed by deionized water, 30% diluted hydrochloric acid and absolute ethyl alcohol for many times and dried under vacuum at 25 °C.

#### **In situ synthesis of NiPt/graphene catalysts**

In a typical experiment, 8 mg GO were dissolved in 5 mL of water kept in a two-necked round-bottom flask. Ultrasonication was required to get a uniform dispersion. 0.7 mL potassium chloroplatinate solution ( $0.1 \text{ mol L}^{-1}$ ) and 0.3 mL nickel chloride solution ( $0.1 \text{ mol L}^{-1}$ ) was added into the flask. The resulting mixture was then reduced by 4 ml of aqueous solution containing 75.8 mg  $\text{NaBH}_4$  and 80 mg  $\text{NaOH}$  with vigorous stirring at 25 °C. One neck was connected to a gas burette to monitor the volume of the gas evolution, and the other for the introduction of hydrazine monohydrate (0.1 mL, 1.96 mmol). A water bath was used to control the temperature of the reaction solution at 50 °C. The gas released during the reaction was passed through a  $\text{HCl}$  solution (1.0 M) before it was measured volumetrically. The selectivity towards  $\text{H}_2$  generation (X) can be calculated using eqn (3)

$$X = (3 \lambda - 1) / 8 \quad [\lambda = n(\text{H}_2 + \text{N}_2) / n(\text{H}_2\text{NNH}_2)] \quad (3)$$

In order to optimize the reaction condition for catalytic dehydrogenation of hydrazine, the molar ratio of Ni/Pt varied from 1:9, 3:7, 5:5, 7:3, 9:1 in different reaction trials, when the molar ratio of metal to hydrazine was kept as a constant of 0.010.

The temperatures were varied from 25 to 60 °C, to obtain the activation energy ( $E_a$ ). (metal/ $\text{N}_2\text{H}_4 \cdot \text{H}_2\text{O}$  = 0.005)

Sets of experiments were performed for comparison. Ni/graphene and Pt/graphene were performed in the same way as NiPt/graphene, and a physical mixture of 30% Ni/graphene and 70% Pt/graphene is used for testing the catalytic in hydrazine dehydrogenation. The mixture of  $\text{Ni}_3\text{Pt}_7$  and graphene is following the analogous process.

### **Different support**

Sets of experiments with different support (such as  $\text{SiO}_2$ , PVP and carbon black) were performed at room temperature ( $25 \pm 0.2$  °C). All the experiments were performed in the same way as described in the section 2.3.

### **Characterization**

The morphologies and sizes of the samples were observed by using a Titan G2 60-300 Probe Cs Corrector HRSTEM/Tecnai G20 U-Twin transmission electron microscope (TEM) equipped with an energy dispersive X-ray detector (EDX) at an acceleration voltage of 200 kV. Powder X-ray diffraction (XRD) patterns were measured by a Bruker D8-Advance/PANalytical X'Pert Pro X-ray diffractometer

using Cu Ka radiation source ( $\lambda = 0.154178$  nm) with a velocity of  $1^\circ \text{ min}^{-1}$ . FTIR spectra were collected at room temperature using a Thermo FTIR-iS10 instrument with KBr discs in the  $400\text{-}4000 \text{ cm}^{-1}$  region. Raman spectra were carried out with a confocal Raman microscope (Renishaw, RM-1000) at 514.5 nm excitation wavelength. MS of the generated gases were collected by using a Ametek Dycor mass spectrometer under Ar atmosphere. X-ray photoelectron spectroscopy (XPS) measurement was performed with a Kratos XSAM 800 spectrophotometer.

## References:

- [S1] W. S. J. Hummers and R. E. Offeman, *J. Am. Chem. Soc.*, 1958, **80**, 1339.
- [S2] D. C. Marcano, D. V. Kosynkin, J. M. Berlin, A. Sinitskii, Z. Z. Sun, A. Slesarev, L. B. Alemany, W. Lu and J. M. Tour, *ACS Nano*, 2010, **4**, 4806.
- [S3] K. Aranishi, A. K. Singh and Q. Xu, *ChemCatChem*, 2013, **5**, 2248.
- [S4] S. K. Singh, A. K. Singh, K. Aranishi and Q. Xu, *J. Am. Chem. Soc.*, 2011, **133**, 19638.
- [S5] N. Cao, J. Su, W. Luo and G. Z. Cheng, *Int. J. Hydrogen Energy*, 2014, **39**, 9726.
- [S6] A. K. Singh and Q. Xu, *ChemCatChem*, 2013, **5**, 3000.
- [S7] J. J. Zhang, Q. Kang, Z. Q. Yang, H. B. Dai, D. W. Zhuang and P. Wang, *J. Mater. Chem. A*, 2013, **1**, 11623.
- [S8] S. K. Singh, Z. H. Lu and Q. Xu, *Eur. J. Inorg. Chem.*, 2011, 2232.

- [S9] S. K. Singh, Y. Iizuka and Q. Xu, *Int. J. Hydrogen Energy*, 2011, **36**, 11794.
- [S10] A. K. Singh, M. Yadav, K. Aranishi and Q. Xu, *Int. J. Hydrogen Energy*, 2012, **36**, 18915.
- [S11] L. He, Y. Q. Huang, A. Q. Wang, X. D. Wang and T. Zhang, *AIChE J.*, 2013, **59**, 4297.
- [S12] L. He, Y. Q. Huang, A. Q. Wang, Y. Liu, X. Y. Liu, X. W. Chen, J. J. Delgado, X. D. Wang and T. Zhang, *J. Catal.*, 2013, **298**, 1.
- [S13] W. Gao, C. M. Li, H. Chen, M. Wu, S. He, M. Wei, D. G. Evans and X. Duana, *Green Chem.*, 2014, **16**, 1560.
- [S14] H. L. Wang, J. M. Yan, Z. L. Wang, S. -H. O and Q. Jiang, *J. Mater. Chem. A*, 2013, **1**, 14957.
- [S15] J. Wang, X. B. Zhang, Z. L. Wang, L. M. Wang and Y. Zhang, *Energy Environ. Sci.*, 2012, **5**, 6885.
- [S16] S. K. Singh and Q. Xu, *J. Am. Chem. Soc.*, 2009, **131**, 18032.
- [S17] S. K. Singh and Q. Xu, *Inorg. Chem.*, 2010, **49**, 6148.
- [S18] S. K. Singh, X. B. Zhang and Q. Xu, *J. Am. Chem. Soc.*, 2009, **131**, 9894.
- [S19] S. K. Singh and Q. Xu, *Chem. Commun.*, 2010, **46**, 6545.

## Figure captions

Figure S1. (left) The HAADF-STEM image for Ni<sub>3</sub>Pt<sub>7</sub>/graphene. (right) The EDX elemental mapping of the Ni<sub>3</sub>Pt<sub>7</sub>/graphene.

Figure S2. Raman spectra of GO and Ni<sub>3</sub>Pt<sub>7</sub>/graphene.

Figure S3. FTIR spectra of GO and Ni<sub>3</sub>Pt<sub>7</sub>/graphene.

Figure S4. MS profile for the gases released from the decomposition reaction of hydrazine in aqueous NaOH solution (0.5 M) over Ni<sub>3</sub>Pt<sub>7</sub>/graphene (metal/N<sub>2</sub>H<sub>4</sub>•H<sub>2</sub>O = 0.005) under an argon atmosphere at 25 °C.

Figure S5. (a) Time course plots for hydrogen generation by the decomposition of hydrazine by Ni<sub>3</sub>Pt<sub>7</sub>/graphene at 25°C, 40°C, 50°C and 60°C. (b) Plot of ln k versus 1/T during the hydrazine decomposition over Ni<sub>3</sub>Pt<sub>7</sub>/graphene at different temperatures. (metal/N<sub>2</sub>H<sub>4</sub>•H<sub>2</sub>O = 0.005)

Figure S6. The XPS spectra of (a) Pt and (b) Ni in Ni<sub>3</sub>Pt<sub>7</sub>/graphene before (0 s) and after (514.8 s and 1017.5 s) argon sputtering

Figure S7. Durability test of Ni<sub>3</sub>Pt<sub>7</sub>/graphene and for decomposition of hydrazine in aqueous NaOH solution (0.5 M) at 25°C (metal/N<sub>2</sub>H<sub>4</sub>•H<sub>2</sub>O = 0.005). Additional aliquots of hydrazine monohydrate were subsequently introduced into the reaction vessel after the completion of the last runs.

Figure S1

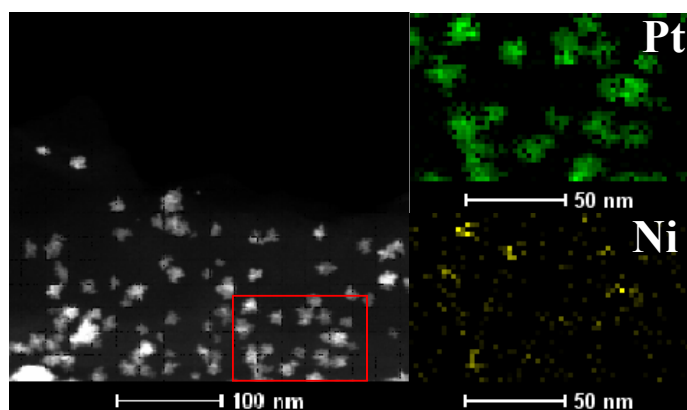

Figure S2

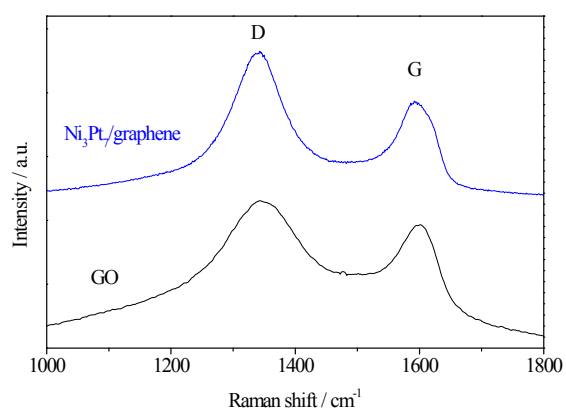

Figure S3

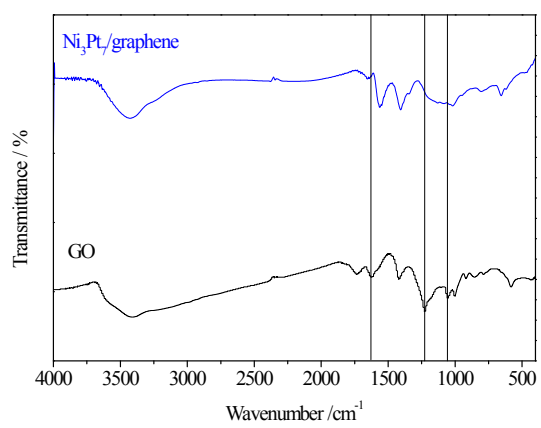

Figure S4

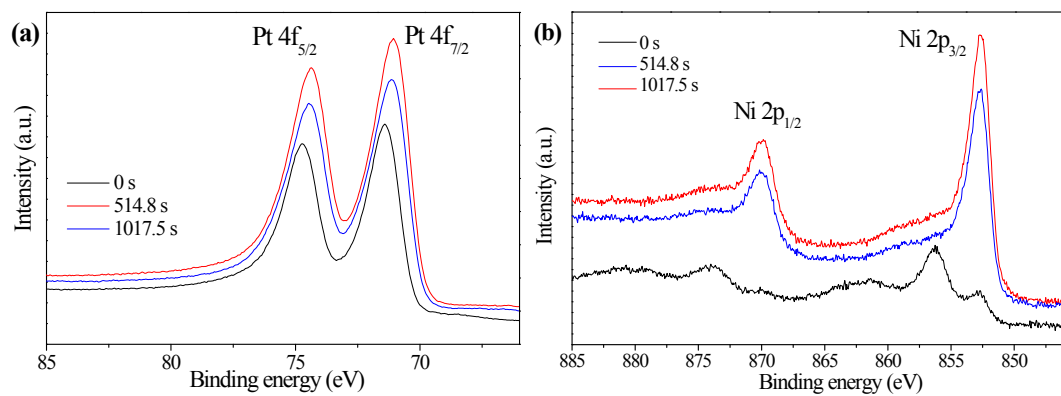

Figure S5

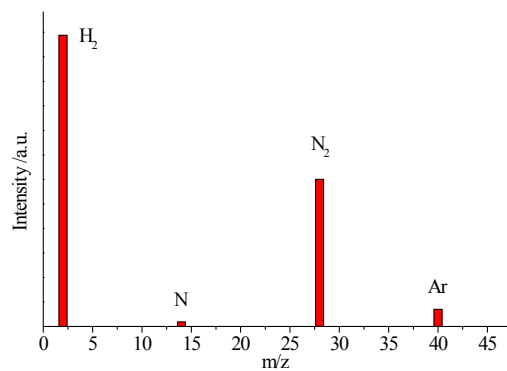

Figure S6

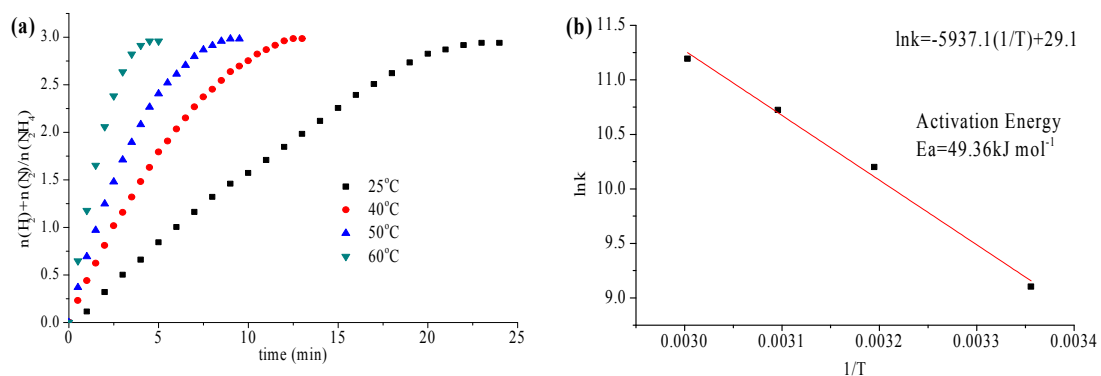



Figure S7

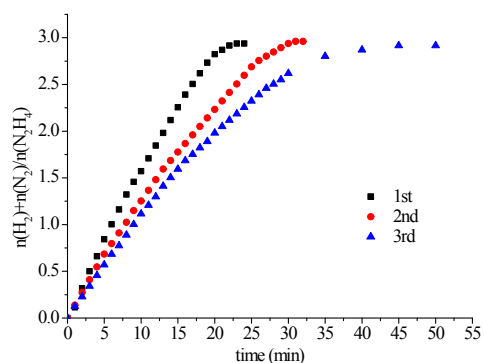

**Table S1.** Comparison of activities and Ea of different catalysts for hydrogen generation by  $\text{H}_2\text{NNH}_2 \cdot \text{H}_2\text{O}$  decomposition.

| Catalyst                                                          | T (°C) | TOF( $\text{h}^{-1}$ ) | Ea(kJ/mol) | Reference  |
|-------------------------------------------------------------------|--------|------------------------|------------|------------|
| G4-OH( $\text{Pt}_{12}\text{Ni}_{48}$ )                           | 70     | 240                    | --         | S3         |
| NiFe                                                              | 70     | 6.6                    | --         | S4         |
| $\text{Ni}_3\text{Pt}_7/\text{graphene}$                          | 50     | 416                    | --         | This study |
| $\text{Ni}_{88}\text{Pt}_{12}@\text{MIL-101}$                     | 50     | 350                    | 55.5       | S5         |
| $\text{Ni}_{80}\text{Pt}_{20}@\text{ZIF-8}$                       | 50     | 90                     | --         | S6         |
| $\text{Ni}_{64.1}\text{Mo}_{11.5}\text{B}_{24.4}\text{-La(OH)}_3$ | 50     | 13.3                   | 55.1       | S7         |
| $\text{Ni}_{0.99}\text{Pt}_{0.01}$                                | 50     | 6                      | 49.95      | S8         |
| $\text{Ni}_{0.6}\text{Pd}_{0.4}$                                  | 50     | 6                      | --         | S9         |
| $\text{Rh}_{10}\text{Ni}_{90}$                                    | 50     | 4.5                    | --         | S10        |
| Raney Ni-300                                                      | 30     | 114                    | 44.4       | S11        |
| $\text{NiPt}_{0.057}/\text{Al}_2\text{O}_3$                       | 30     | 16.5                   | 49.3       | S12        |
| $\text{Ni}/\text{Al}_2\text{O}_3$                                 | 30     | 2.2                    | 34         | S12        |
| $\text{Ni}_{1.5}\text{Fe}_{1.0}\text{-alloy}/(\text{MgO})_{3.5}$  | 26     | 1.9                    | --         | S13        |
| $\text{Ni}_3\text{Pt}_7/\text{graphene}$                          | 25     | 68                     | 49.36      | This study |
| $\text{Ni}_{0.9}\text{Pt}_{0.1}/\text{Ce}_2\text{O}_3$            | 25     | 28.1                   | 42.3       | S14        |
| $\text{Rh}_4\text{Ni}/\text{graphene}$                            | 25     | 20                     | --         | S15        |
| $\text{Rh}_4\text{Ni}$                                            | 25     | 9.6                    | --         | S16        |
| $\text{Ni}_{0.93}\text{Pt}_{0.07}$                                | 25     | 3                      | --         | S17        |
| Rh                                                                | 25     | 2.8                    | --         | S18        |
| $\text{Ni}_{0.95}\text{Ir}_{0.05}$                                | 25     | 1.6                    | --         | S19        |
